# Supplementary material for: Association between Ambient Air Pollution and Emergency Room Visits for Pediatric Respiratory Diseases: The Impact of COVID-19 Pandemic
Source: MDPI journal article supplement (doi:10.3390/toxics10050247), 2022-05-14
Supplement: s1 [file s1]

# Supplementary Materials: Association between Ambient Air Pollution and Emergency Room Visits for Pediatric Respiratory Diseases: The Impact of COVID-19 Pandemic

Chi-Yung Cheng, Yu-Lun Tseng, Kuo-Chen Huang, I-Min Chiu, Hsiu-Yung Pan and Fu-Jen Cheng

**Table S1.** Demographic characteristics and diagnoses during study period.

| All                                         | Pre-COVID       | During-COVID    |
|---------------------------------------------|-----------------|-----------------|
| Demographic characteristics of patients     | <i>n</i> = 8991 | <i>n</i> = 1405 |
| Age (mean ± SD)                             | 4.5 ± 3.7       | 4.7 ± 3.8       |
| Male                                        | 4947            | 763             |
| Past medical history of respiratory disease | 221             | 31              |
| Pneumonia                                   | 816             | 139             |
| Upper respiratory tract infection           | 5230            | 863             |
| Bronchitis                                  | 2311            | 325             |
| Asthma                                      | 634             | 78              |

(A)

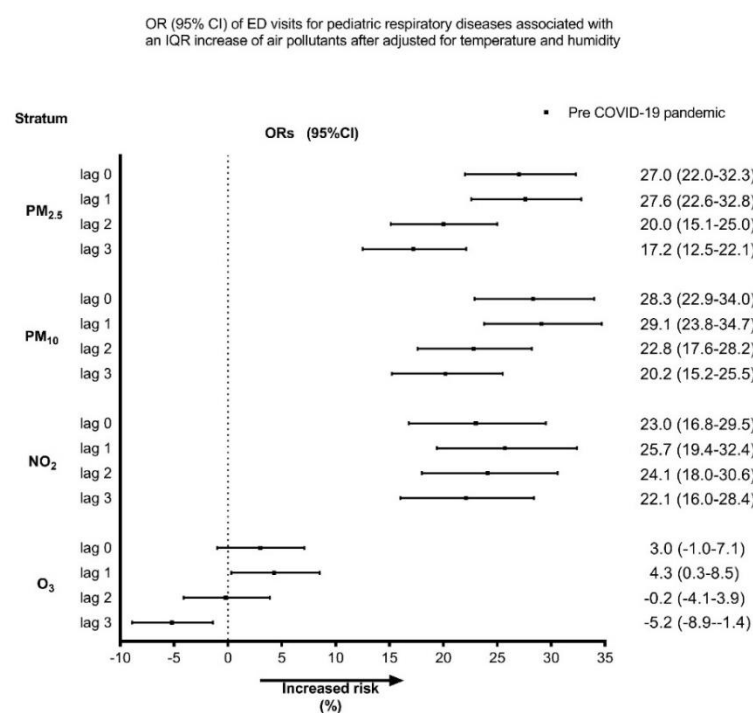

(B)

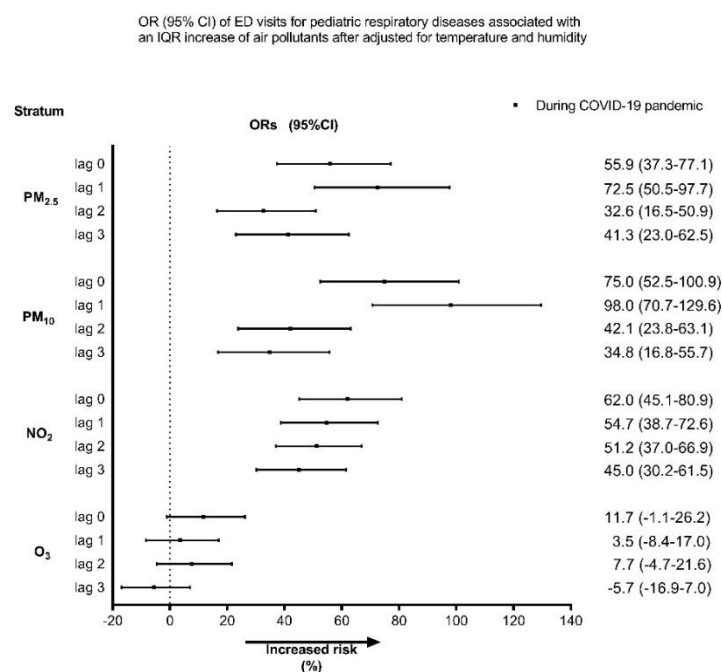

**Figure S1.** confidence intervals (CIs) for pediatric respiratory dis-ease-related ED visits associated with IQR increments in each air pollutant, pre- COVID-19 pandemic (A) and during the COVID-19 pandemic (B), with adjustments for temperature and humidity. ED, emergency depart-ment; IQR, interquartile range.
